# Supplementary material for: Nanodisc reconstitution of flavin mononucleotide binding domain of cytochrome-P450-reductase enables high-resolution NMR probing
Source: Royal Society of Chemistry journal article supplement (doi:10.1039/d1cc01018b), 2021-01-01
Supplement: d1cc01018b1.pdf [file d1cc01018b1.pdf]

# Supplementary Information

## **Nanodisc reconstitution of flavin mononucleotide binding domain of cytochrome-P450-reductase enables high-resolution NMR probing**

Bankala Krishnarjuna,<sup>1</sup> Toshio Yamazaki,<sup>2</sup> G. M. Anantharamaiah,<sup>3</sup> and Ayyalusamy Ramamoorthy<sup>1\*</sup>

<sup>1</sup>*Biophysics Program, Department of Chemistry, Biomedical Engineering, Macromolecular Science and Engineering, University of Michigan, Arbor, MI 48109, USA.*

<sup>2</sup>*NMR Facility, Division of Structural and Synthetic Biology, RIKEN, 1-7-22 Suehiro-cho, Tsurumi-ku, Yokohama City, Kanagawa 230-0045, Japan*

<sup>3</sup>*Department of Medicine, University of Alabama at Birmingham Medical Center, Birmingham, AL, 35294, USA*

### **Corresponding author**

E-mail: ramamoor@umich.edu

## **Materials and Methods**

### **Bacterial expression of the full-length FBD**

*E. coli* C41 cells (purchased from Lucigen Corporation [Wisconsin]) were cultured in Luria-Bertani (LB [Fisher Scientific, Pittsburgh, USA]) media and the competent cells were made using standard protocols.<sup>1</sup> The competent cells were transformed with a pSC-rat plasmid containing the gene sequence for full-length FBD expression. A single colony was inoculated into 100 mL of LB media and grown overnight at 37 °C in a shaking incubator at 200 rpm. The cells from an overnight culture were collected by centrifugation at 3000 rpm for 10 min at 4 °C. The cell pellet was resuspended in a freshly prepared M9 medium containing 40 mM Na<sub>2</sub>HPO<sub>4</sub>, 20 mM KH<sub>2</sub>PO<sub>4</sub>, 8.5 mM NaCl (Fisher Scientific, Pittsburgh, USA), 1 mM MgSO<sub>4</sub>, 1 μM CaCl<sub>2</sub>, 5.3 nM FMN (Sigma-Aldrich, Missouri, USA), 0.1% [w/v] <sup>15</sup>NH<sub>4</sub>Cl (Cambridge Isotope Laboratories) and 0.4% [w/v] <sup>13</sup>C-glucose (Cambridge Isotope Laboratories). When the culture optical density (OD<sub>600</sub>) reached to ~0.6, the temperature was decreased to 30 °C and adjusted shaking speed to 160 rpm. Protein was overexpressed for 16 h by adding 0.4 mM isopropyl β-D-1-thiogalactopyranoside (Sigma-Aldrich, Missouri, USA). The cells were harvested by centrifugation at 6000 rpm for 10 min and stored at -80 °C until protein purification.

### **Purification of the full-length FBD**

The cell pellets were thawed and resuspended using an ice-cold 100 mM Tris-acetate buffer containing 0.1 mM EDTA, 0.2 mM DTT and protease inhibitors. The cells were lysed by incubating with lysozyme (DOT Scientific, Michigan, USA) at 50 μg/mL for 15-20 min followed by sonication (five pulses each 10 sec long with 30-sec interval) at ~4 °C. The membrane fraction was collected by ultracentrifugation (Beckman L-70, California, USA) at 35,000 rpm for 45 min at 4 °C, and the protein in the membranes was solubilized with 0.3% (v/v) Triton-X 100 at 4 °C via slow stirring overnight. The protein solution was ultracentrifuged for 45 min at 4 °C, and the supernatant containing full-length FBD was loaded on to a DEAE-Sepharose column pre-equilibrated with loading buffer (50 mM Tris-acetate [pH 6.7] containing 0.1 mM EDTA, 0.2 mM DTT, 10% glycerol, 1 μM FMN [Sigma-Aldrich], and 0.3% sodium cholate [Sigma-Aldrich]). The column was washed with 5 column volumes of loading buffer, 5 column volumes of washing buffer (loading buffer+150 mM NaCl) and the protein was eluted using a NaCl linear-gradient (700 mM NaCl).

#### **4F peptide**

4F peptide (DWFKAFYDKVAEKFKKEAF) was synthesized and purified as reported earlier.<sup>2, 3</sup>

#### **Preparation of 4F peptide-based DMPC-nanodiscs**

The lyophilized 4F peptide<sup>3</sup> was dissolved in 10 mM potassium phosphate buffer pH 7.4 at 10 mg/mL concentration in 1.5 mL centrifuge tube. The DMPC (Avanti Polar Lipids; Alabama, USA) lipids were mixed with the same buffer at 20 mg/mL concentration in 1.5 mL centrifuge tube, and a homogenous milky solution containing liposomes was prepared by vortexing/freezing-thawing (three cycles of freezing in liquid N<sub>2</sub> and thawing in hot water at 40 °C). The peptide and DMPC-liposome solutions were mixed at 1:1.5 (w/w) ratio (milky colored liposomes were dissolved and the solution became transparent) and incubated overnight at 37 °C with gentle agitation (100 rpm). After 16 h, the transparent solution was observed indicating the formation of soluble 4F-DMPC nanodiscs. A longer incubation is recommended to achieve the best results. These nanodiscs were purified by 10x600 Superdex 200 size-exclusion chromatography (SEC) (GE Healthcare, Chicago, USA) operated on AKTA-FPLC (GE Healthcare, Chicago, USA).

#### **Reconstitution and purification of the full-length FBD in 4F-DMPC nanodiscs**

The purified full-length FBD was incubated overnight with nanodiscs at 1:1.2 (w/w) protein to nanodiscs ratio at 25 °C with gentle agitation. It is recommended to mix the nanodiscs and the detergent-containing protein solution at 9:1 (v/v) ratio to avoid any detrimental effects of the detergent on the stability of the lipid-nanodiscs. The protein-nanodiscs complex was then purified by 10x600 Superdex 200 SEC (GE Healthcare, Chicago, USA) using 40 mM potassium phosphate buffer (pH 7.4). The fractions containing the protein after SDS-PAGE analysis were pooled and concentrated for high-resolution NMR experiments.

#### **Dynamic light scattering (DLS)**

DLS experiments for measuring the hydrodynamic radius of 4F-DMPC nanodiscs with and without the full-length FBD were performed using Wyatt Technology® DynaPro® NanoStar® using a 1 µL quartz MicroCuvette. The data were analyzed using the Origin computer program.

#### **NMR spectroscopy and resonance assignments**

Full-length FBD sample was prepared at 0.3 mM concentration in 40 mM potassium phosphate buffer (pH 7.4) containing 10 % <sup>2</sup>H<sub>2</sub>O. NMR data were collected at 25 °C. One-dimensional <sup>1</sup>H,

two-dimensional (2D) [ $^{15}\text{N}$ - $^1\text{H}$ ]-HSQC, three-dimensional (3D) CBCA(CO)NH, 3D HNCACB and 3D TROSY-HNCA were recorded on 600 MHz and 900 MHz Bruker NMR spectrometers equipped with a cryogenically-cooled triple-resonance ( $^1\text{H}$ ,  $^{15}\text{N}$ ,  $^{13}\text{C}$ ) probes (Billerica, MA, USA). The data were collected utilizing traditional sampling conditions and processed in the Bruker TopSpin software (version 4.0.6.). 2D [ $^{15}\text{N}$ - $^1\text{H}$ ]-HSQC and 2D [ $^{13}\text{C}$ - $^1\text{H}$ ]-HSQC NMR spectra were recorded at different time points to monitor the stability of the protein reconstituted in nanodiscs. Chemical shift analysis and data interpretation were performed using CcpNmr Analysis (version 2.4.2).<sup>4</sup> The chemical shifts from CcpNmr were exported in Shifty format, and the Chemical Shift Index (CSI version 3)<sup>5</sup> was used to predict the secondary structure of full-length FBD. Line-widths were measured in CcpNmr by using the parabolic fit method.

### **Chemical shift perturbations (CSPs)**

The weighting of chemical shifts from  $^1\text{H}$  and  $^{15}\text{N}$  resonances was performed using the following equation:<sup>6</sup>

$$\text{Weighted CSP} = \sqrt{\frac{1}{2}[\delta_{\text{H}}^2 + (0.14 \cdot \delta_{\text{N}})^2]}$$

Where,  $\delta_{\text{H}}$  and  $\delta_{\text{N}}$  are the CSP (ppm) at  $^1\text{H}$  and  $^{15}\text{N}$  dimensions, respectively.

### **Figures**

The protein structure images were generated using PyMOL, the graphs/plots were generated using EXCEL, and the images were generated using GIMP.

**Table S1.** Parameters used for NMR experiments carried out at 25 °C on Bruker 600 MHz and 900 MHz NMR spectrometers.

| Experiment name                         | Encoded nucleus |                 |                | Complex points |      |       | Spectral width (ppm) |                 |                 | Carrier offset (ppm) |                 |                 | Number of scans |
|-----------------------------------------|-----------------|-----------------|----------------|----------------|------|-------|----------------------|-----------------|-----------------|----------------------|-----------------|-----------------|-----------------|
|                                         | F1              | F2              | F3             | F1             | F2   | F3    | <sup>1</sup> H       | <sup>15</sup> N | <sup>13</sup> C | <sup>1</sup> H       | <sup>15</sup> N | <sup>13</sup> C |                 |
| <sup>1</sup> H 1D                       | <sup>1</sup> H  |                 |                |                |      | 32768 | 20                   |                 |                 | 4.7                  |                 |                 | 128             |
| [ <sup>13</sup> C- <sup>1</sup> H]-HSQC | <sup>13</sup> C | <sup>1</sup> H  |                | 256            | 1024 |       | 16                   |                 | 165             | 4.7                  | 75              |                 | 16              |
| [ <sup>15</sup> N- <sup>1</sup> H]-HSQC | <sup>15</sup> N | <sup>1</sup> H  |                | 256            | 2048 |       | 16                   | 30              |                 | 4.7                  | 118.5           |                 | 8               |
| 3D HNCA                                 | <sup>13</sup> C | <sup>15</sup> N | <sup>1</sup> H | 96             | 48   | 2048  | 17                   | 30              | 40              | 4.7                  | 118.5           | 54              | 16              |
| 3D HNCACB                               | <sup>13</sup> C | <sup>15</sup> N | <sup>1</sup> H | 120            | 72   | 2048  | 14                   | 30              | 65              | 4.7                  | 118.5           | 47.5            | 40              |
| 3D CBCA(CO)NH                           | <sup>13</sup> C | <sup>15</sup> N | <sup>1</sup> H | 160            | 64   | 2048  | 17                   | 30              | 70              | 4.7                  | 118.5           | 39              | 24              |

**Table S2.**  $H^N$ ,  $N^H$ ,  $C\alpha$  and  $C\beta$  chemical shifts (given in ppm) measured from the full-length FBD reconstituted in peptide-based lipid nanodiscs using 3D NMR experiments (BMRB id: 50744).

| AA No. | AA  | $H^N$ | $N^H$  | $C\alpha$ | $C\beta$ |
|--------|-----|-------|--------|-----------|----------|
| 1      | Met | –     | –      | 52.93     | 29.68    |
| 2      | Gly | 8.26  | 110.03 | 42.52     | –        |
| 3      | Asp | 8.08  | 120.88 | 51.55     | 38.56    |
| 5      | His | –     | –      | 53.29     | 27.05    |
| 6      | Glu | 8.22  | 122.55 | 53.79     | 27.60    |
| 7      | Asp | 8.30  | 122.26 | 51.64     | 38.30    |
| 8      | Thr | 8.11  | 115.74 | 59.25     | 66.81    |
| 9      | Ser | 8.25  | 118.89 | 56.34     | 61.06    |
| 10     | Ala | 8.07  | 125.98 | 49.84     | 16.47    |
| 11     | Thr | 7.90  | 113.86 | 59.20     | 67.14    |
| 12     | Met | 8.23  | 124.86 | 50.46     | 29.64    |
| 13     | Pro | –     | –      | 60.40     | 29.40    |
| 14     | Glu | 8.31  | 121.57 | 53.82     | 27.43    |
| 15     | Ala | 8.18  | 126.06 | 49.59     | 16.50    |
| 16     | Val | 7.96  | 120.66 | 59.18     | 29.94    |
| 17     | Ala | 8.24  | 128.97 | 49.75     | 16.52    |
| 18     | Glu | 8.21  | 121.31 | 53.56     | 27.51    |
| 52     | Pro | –     | –      | 60.43     | 29.31    |
| 53     | Glu | 8.35  | 121.67 | 53.70     | 27.48    |
| 54     | Phe | 8.38  | 122.58 | 51.60     | 38.40    |
| 55     | Ser | 8.12  | 116.43 | 55.65     | 61.15    |
| 56     | Lys | 8.03  | 123.63 | 53.62     | 30.13    |
| 57     | Ile | 7.91  | 122.38 | 58.50     | 35.71    |
| 58     | Gln | 8.33  | 125.48 | 52.83     | 26.85    |
| 59     | Thr | 8.15  | 116.91 | 59.04     | 67.03    |
| 60     | Thr | 8.03  | 117.42 | 59.22     | 67.23    |
| 61     | Ala | 8.30  | 129.28 | 47.75     | 15.41    |
| 64     | Val | –     | –      | 59.33     | 29.85    |
| 65     | Lys | 8.30  | 126.08 | 53.29     | 30.31    |
| 66     | Glu | 8.41  | 123.09 | 54.30     | 27.37    |
| 67     | Ser | 8.00  | 114.90 | 55.96     | 61.26    |
| 68     | Ser | 8.03  | 115.66 | 53.95     | 61.33    |
| 69     | Phe | 7.84  | 125.09 | 56.75     | 32.72    |
| 70     | Val | 6.91  | 124.70 | 63.53     | 28.45    |
| 71     | Glu | 7.11  | 120.08 | 56.09     | 26.31    |
| 72     | Lys | 7.43  | 119.41 | 56.96     | 29.36    |
| 73     | Met | 8.25  | 121.58 | 57.53     | 31.24    |
| 74     | Lys | 8.19  | 119.28 | 57.54     | 30.31    |
| 75     | Lys | 7.96  | 117.88 | 55.92     | 30.31    |
| 76     | Thr | 7.39  | 105.17 | 58.21     | 67.46    |
| 77     | Gly | 7.45  | 112.77 | 44.48     | –        |
| 78     | Arg | 8.28  | 119.21 | 52.67     | 30.19    |
| 79     | Asn | 8.60  | 115.89 | 50.56     | 36.65    |
| 80     | Ile | 7.57  | 119.61 | 56.62     | 37.97    |
| 81     | Ile | 8.09  | 126.50 | 54.62     | 37.94    |
| 82     | Val | 8.25  | 126.89 | 56.01     | 29.56    |
| 83     | Phe | 8.60  | 124.52 | 53.93     | 39.42    |
| 84     | Tyr | 7.23  | 115.02 | 49.85     | 37.64    |
| 85     | Gly | 8.89  | 111.95 | 43.68     | –        |
| 86     | Ser | 7.71  | 116.09 | 53.60     | 66.58    |
| 87     | Gln | 10.91 | 133.57 | 54.48     | 27.25    |
| 88     | Thr | 9.55  | 110.27 | 57.59     | 65.29    |

|     |     |       |        |       |       |
|-----|-----|-------|--------|-------|-------|
| 89  | Gly | 7.48  | 109.42 | 43.78 | -     |
| 90  | Thr | 9.64  | 127.13 | 64.66 | 63.56 |
| 91  | Ala | 10.61 | 125.45 | 52.17 | 15.80 |
| 92  | Glu | 6.34  | 115.33 | 56.10 | 26.36 |
| 93  | Glu | 7.48  | 121.92 | 57.03 | 25.09 |
| 94  | Phe | 8.02  | 119.75 | 54.80 | 33.53 |
| 95  | Ala | 8.24  | 122.17 | 52.61 | 16.92 |
| 96  | Asn | 8.16  | 118.47 | 53.57 | 35.69 |
| 97  | Arg | 8.48  | 122.74 | 57.49 | 28.05 |
| 98  | Leu | 8.34  | 118.57 | 55.08 | 40.43 |
| 99  | Ser | 8.21  | 112.32 | 60.03 | 60    |
| 100 | Lys | 7.60  | 121.55 | 56.11 | 29.57 |
| 101 | Asp | 8.13  | 121.44 | 53.72 | 39.55 |
| 102 | Ala | 6.81  | 117.42 | 52.65 | 15.67 |
| 103 | His | 7.14  | 114.95 | 55.77 | 27.09 |
| 104 | Arg | 7.42  | 119.78 | 55.06 | 26.08 |
| 105 | Tyr | 6.84  | 117.02 | 53.89 | 35.57 |
| 106 | Gly | 7.18  | 104.68 | 43.10 | -     |
| 107 | Met | 7.24  | 118.36 | 51.60 | 32.78 |
| 108 | Arg | 7.93  | 117.56 | 53.39 | 31.25 |
| 109 | Gly | 8.95  | 112.80 | 41.33 | -     |
| 110 | Met | 7.82  | 115.00 | 52.15 | 33.65 |
| 111 | Ser | 8.58  | 118.40 | 53.20 | 63.13 |
| 112 | Ala | 8.48  | 123.15 | 48.61 | 20.90 |
| 113 | Asp | 8.53  | 123.59 | 46.85 | 38.84 |
| 114 | Pro | -     | -      | 61.95 | 28.48 |
| 115 | Glu | 8.11  | 119.72 | 56.21 | 26.67 |
| 116 | Glu | 7.34  | 114.69 | 53.89 | 27.64 |
| 117 | Tyr | 7.52  | 117.42 | 54.66 | 40.79 |
| 118 | Asp | 8.52  | 118.49 | 49.61 | 38.58 |
| 119 | Leu | 8.70  | 130.33 | 53.53 | 34.59 |
| 120 | Ala | 7.54  | 122.06 | 52.11 | 15.10 |
| 121 | Asp | 7.67  | 116.47 | 53.25 | 37.21 |
| 122 | Leu | 8.25  | 122.14 | 55.71 | 40.92 |
| 123 | Ser | 7.44  | 109.14 | 58.28 | 60.55 |
| 124 | Ser | 7.81  | 116.52 | 56.53 | 61.44 |
| 125 | Leu | 7.56  | 125.16 | 56.23 | 38.06 |
| 126 | Pro | -     | -      | 62.15 | 28.04 |
| 127 | Glu | 7.66  | 115.89 | 55.22 | 27.19 |
| 128 | Ile | 7.92  | 121.35 | 57.75 | 36.23 |
| 129 | Asp | 8.52  | 129.63 | 53.08 | 38.56 |
| 130 | Lys | 8.50  | 118.12 | 54.38 | 26.43 |
| 131 | Ser | 7.15  | 110.48 | 53.86 | 62.80 |
| 132 | Leu | 7.99  | 118.87 | 52.10 | 43.24 |
| 133 | Val | 8.63  | 122.80 | 54.22 | 31.70 |
| 134 | Val | 8.53  | 126.36 | 55.82 | 32.01 |
| 135 | Phe | 8.48  | 122.79 | 53.74 | 38.70 |
| 136 | Cys | 8.96  | 123.70 | 54.71 | 25.55 |
| 137 | Met | 8.10  | 118.57 | 50.11 | 32.17 |
| 138 | Ala | 9.12  | 132.75 | 48.86 | 18.29 |
| 139 | Thr | 6.88  | 113.67 | 60.52 | 68.11 |
| 140 | Tyr | 8.50  | 130.07 | 54.47 | 38.11 |
| 141 | Gly | 7.67  | 106.72 | 44.70 | -     |
| 142 | Glu | -     | -      | 52.44 | 24.72 |
| 143 | Gly | 7.54  | 105.94 | 43.67 | -     |
| 145 | Pro | -     | -      | 58.97 | 28.82 |
| 146 | Thr | 7.31  | 108.14 | 58.69 | 66.85 |

|     |     |      |        |       |       |
|-----|-----|------|--------|-------|-------|
| 147 | Asp | 8.52 | 123.80 | 55.38 | 37.09 |
| 148 | Asn | 9.12 | 117.75 | 51.97 | 34.58 |
| 149 | Ala | 7.50 | 120.80 | 47.41 | 17.71 |
| 150 | Gln | 7.35 | 123.19 | 57.07 | 26.48 |
| 151 | Asp | 8.73 | 119.68 | 55.24 | 36.67 |
| 152 | Phe | -    | -      | 55.69 | -     |
| 153 | Tyr | 8.40 | 121.26 | 58.65 | 36.10 |
| 154 | Asp | 8.63 | 119.68 | 55.12 | 37.11 |
| 155 | Trp | 8.15 | 122.73 | 59.25 | 24.72 |
| 156 | Leu | 8.54 | 119.43 | 53.82 | 39.86 |
| 157 | Gln | 7.35 | 115.56 | 55.59 | 27.28 |
| 158 | Glu | 6.99 | 116.22 | 53.52 | 28.85 |
| 159 | Thr | 7.44 | 116.43 | 60.62 | 65.26 |
| 160 | Asp | 7.37 | 123.04 | 49.67 | 38.59 |
| 161 | Val | 7.79 | 121.45 | 60.21 | 29.55 |
| 162 | Asp | 7.79 | 121.45 | 50.35 | 38.73 |
| 163 | Leu | 8.62 | 125.81 | 50.21 | 38.34 |
| 164 | Thr | 8.16 | 118.40 | 64.05 | 65.62 |
| 165 | Gly | 9.10 | 117.25 | 42.27 | -     |
| 166 | Val | 8.35 | 124.65 | 60.74 | 28.24 |
| 167 | Lys | 8.58 | 130.27 | 51.41 | 30.23 |
| 168 | Phe | 8.52 | 119.26 | 52.91 | 44.03 |
| 169 | Ala | 8.32 | 119.31 | 49.36 | 22.01 |
| 170 | Val | 9.63 | 121.84 | 58.52 | 32.92 |
| 171 | Phe | 8.91 | 126.24 | 55.11 | 38.32 |
| 172 | Gly | 8.50 | 117.07 | 41.72 | -     |
| 173 | Leu | 7.64 | 125.26 | 53.89 | 40.28 |
| 174 | Gly | 6.95 | 108.15 | 42.84 | -     |
| 175 | Asn | 8.96 | 120.30 | 50.84 | 37.00 |
| 176 | Lys | 8.71 | 127.59 | 55.78 | 29.24 |
| 177 | Thr | 8.72 | 112.82 | 60.82 | 66.38 |
| 178 | Tyr | 7.36 | 121.38 | 55.46 | 35.37 |
| 179 | Glu | 8.58 | 121.54 | 56.00 | 26.98 |
| 180 | His | 8.42 | 117.65 | 51.20 | 24.73 |
| 181 | Phe | 7.84 | 125.29 | 53.52 | 35.72 |
| 182 | Asn | 9.65 | 127.92 | 52.04 | 36.63 |
| 183 | Ala | 6.54 | 116.83 | 53.44 | 17.50 |
| 184 | Met | 8.44 | 116.99 | 54.36 | 27.94 |
| 185 | Gly | 8.21 | 107.64 | 44.15 | -     |
| 186 | Lys | 7.70 | 117.28 | 57.37 | 30.27 |
| 187 | Tyr | 7.98 | 120.41 | 59.33 | 35.47 |
| 188 | Val | 8.34 | 118.63 | 64.62 | 29.06 |
| 189 | Asp | 7.54 | 115.96 | 55.06 | 42.10 |
| 190 | Gln | 7.42 | 115.62 | 55.37 | 26.17 |
| 191 | Arg | 8.71 | 121.82 | 54.01 | 26.51 |
| 192 | Leu | 7.75 | 116.95 | 55.51 | 36.09 |
| 193 | Glu | 6.28 | 117.55 | 55.84 | 26.91 |
| 194 | Gln | 7.85 | 122.64 | 56.20 | 25.42 |
| 195 | Leu | 7.48 | 117.81 | 52.38 | 38.63 |
| 196 | Gly | 7.65 | 106.82 | 41.89 | -     |
| 197 | Ala | 7.76 | 123.33 | 49.38 | 17.49 |
| 198 | Gln | 9.25 | 121.92 | 51.76 | 27.97 |
| 199 | Arg | 8.55 | 131.66 | 52.58 | 27.98 |
| 200 | Ile | 8.76 | 125.25 | 57.44 | 36.02 |
| 201 | Phe | 7.01 | 118.52 | 55.47 | 39.82 |
| 202 | Glu | 5.82 | 124.00 | 53.27 | 27.62 |
| 203 | Leu | 7.97 | 124.13 | 52.44 | 39.29 |



|     |     |       |        |       |       |
|-----|-----|-------|--------|-------|-------|
| 204 | Gly | 8.76  | 117.43 | 42.33 | -     |
| 205 | Leu | 8.46  | 126.62 | 48.79 | 39.69 |
| 206 | Gly | 8.45  | 112.83 | 43.21 | -     |
| 207 | Asp | 9.28  | 125.18 | 49.49 | 40.66 |
| 208 | Asp | 10.13 | 125.41 | 51.85 | 38.74 |
| 209 | Asp | 8.27  | 118.52 | 52.74 | 39.63 |
| 210 | Gly | 7.24  | 107.80 | 42.35 | -     |
| 211 | Asn | 9.33  | 128.31 | 49.54 | 36.05 |
| 212 | Leu | 8.71  | 128.06 | 55.83 | 39.88 |
| 213 | Glu | 8.43  | 119.18 | 57.03 | 25.96 |
| 214 | Glu | 7.55  | 119.34 | 56.53 | 26.54 |
| 215 | Asp | 8.43  | 122.57 | 55.50 | 38.44 |
| 216 | Phe | 8.56  | 122.27 | 57.84 | 35.90 |
| 217 | Ile | 8.78  | 120.89 | 61.81 | 34.14 |
| 218 | Thr | 8.37  | 117.10 | 63.97 | 66.62 |
| 219 | Trp | 7.62  | 123.84 | 59.91 | 26.83 |
| 220 | Arg | 8.90  | 120.87 | 56.87 | 28.15 |
| 221 | Glu | 7.90  | 115.14 | 55.39 | 26.74 |
| 222 | Gln | 6.87  | 116.17 | 53.73 | 28.35 |
| 223 | Phe | 8.07  | 125.63 | 56.30 | 36.01 |
| 224 | Trp | 6.68  | 116.29 | 58.40 | 23.56 |
| 225 | Pro | -     | -      | 63.50 | 27.87 |
| 226 | Ala | 6.58  | 120.63 | 52.46 | 15.39 |
| 227 | Val | 7.77  | 122.59 | 64.16 | 28.89 |
| 228 | Cys | 8.25  | 117.80 | 61.46 | 23.74 |
| 229 | Glu | 7.94  | 119.36 | 56.05 | 26.70 |
| 230 | Phe | 7.98  | 120.63 | 59.46 | 36.42 |
| 231 | Phe | 8.04  | 113.00 | 55.65 | 37.37 |
| 232 | Gly | 7.77  | 111.62 | 44.37 | -     |
| 233 | Val | 7.89  | 115.97 | 57.90 | 31.04 |
| 234 | Glu | 8.07  | 121.94 | 52.45 | 29.01 |
| 235 | Ala | 8.37  | 125.12 | 49.47 | 16.18 |
| 236 | Thr | 8.10  | 114.31 | 59.29 | 67.30 |
| 237 | Gly | 8.21  | 111.25 | 42.37 | -     |
| 238 | Glu | 8.00  | 121.07 | 53.58 | 27.76 |
| 239 | Glu | 7.94  | 127.24 | 55.65 | 28.16 |

**Table S3.** The measured line widths for residues located near the transmembrane domain (residues 12-18 and 53) and from the soluble domain (residues 54-68 and 175-185). Two-dimensional [ $^{15}\text{N}$ - $^1\text{H}$ ]-HSQC NMR spectra were recorded on a 600 MHz Bruker NMR spectrometer equipped with a cryogenically cooled triple-resonance probe operating at 25 °C. The spectra were acquired with 16 scans (for the full-length FBD) or 32 scans (for the truncated FBD) and using 2048 and 256 data points for the  $^1\text{H}$  and  $^{15}\text{N}$  dimensions, respectively.

| Amino acid residue | Full-length FBD                 |                                    | Truncated FBD                   |                                    |
|--------------------|---------------------------------|------------------------------------|---------------------------------|------------------------------------|
|                    | $^1\text{H}$ line width<br>(Hz) | $^{15}\text{N}$ line-width<br>(Hz) | $^1\text{H}$ line width<br>(Hz) | $^{15}\text{N}$ line-width<br>(Hz) |
| 12M                | 23.61                           | 18.5                               |                                 |                                    |
| 14E                | 37.50                           | 17.7                               |                                 |                                    |
| 15A                | 20.59                           | 22.0                               |                                 |                                    |
| 16V                | 39.93                           | 28.6                               |                                 |                                    |
| 17A                | 39.69                           | 21.3                               |                                 |                                    |
| 18E                | 35.97                           | 34.3                               |                                 |                                    |
| 53E                | 40.92                           | 18.8                               |                                 |                                    |
| 54F                | 16.82                           | 14.5                               |                                 |                                    |
| 55S                | 17.14                           | 14.6                               |                                 |                                    |
| 56K                | 18.82                           | 15.3                               |                                 |                                    |
| 57K                | 18.74                           | 12.4                               |                                 |                                    |
| 58Q                | 18.65                           | 15.6                               |                                 |                                    |
| 59T                | 19.59                           | 14.7                               |                                 |                                    |
| 60T                |                                 | 17.9                               |                                 |                                    |
| 61A                | 15.43                           | 14.6                               |                                 |                                    |
| 65K                | 18.49                           | 16.8                               |                                 |                                    |
| 66E                | 19.22                           | 15.6                               |                                 |                                    |
| 67S                | 19.78                           | 16.2                               |                                 |                                    |
| 68S                | 20.36                           | 18.7                               |                                 |                                    |
| 175N               | 22.69                           | 16.1                               | 19.36                           | 11.5                               |
| 176K               | 22.15                           | 16.2                               | 18.26                           | 11.9                               |
| 177T               | 21.96                           | 16.0                               | 20.89                           | 12.1                               |
| 178Y               | 21.30                           | 16.6                               | 20.39                           | 11.2                               |
| 179E               | 23.74                           | 16.7                               | 19.70                           | 13.9                               |
| 180H               | 23.60                           | 16.6                               | 22.49                           | 14.6                               |
| 181F               | 22.65                           | 29.2                               | 18.91                           | 11.8                               |
| 182N               | 24.52                           | 16.8                               | 22.05                           | 11.8                               |
| 183A               | 23.63                           | 15.8                               | 19.84                           | 11.8                               |
| 184M               | 23.32                           | 16.5                               | 20.14                           | 11.8                               |
| 185G               | 23.88                           | 16.1                               | 19.35                           | 11.3                               |

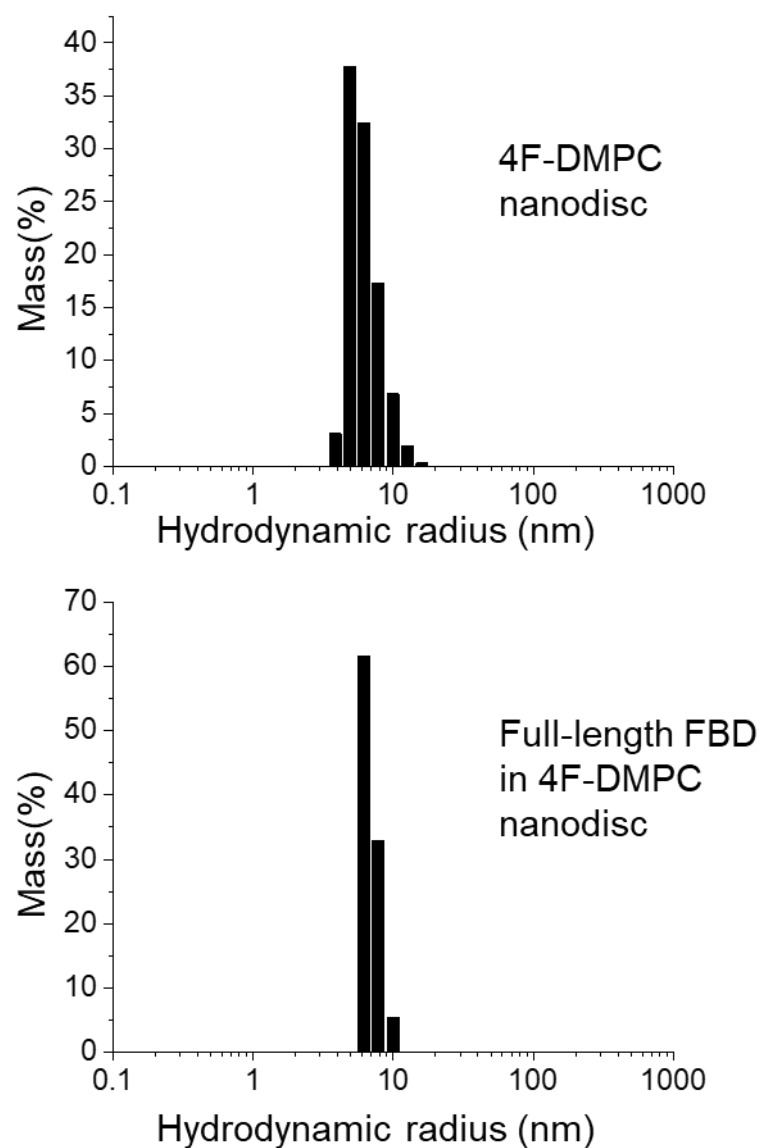

**Figure S1.** Dynamic light scattering measurements of 4F-DMPC nanodiscs before and after the reconstitution of the full-length FBD. The hydrodynamic radius values for 4F-DMPC nanodiscs with and without full-length FBD are measured to be ~6.9 nm and ~6.3 nm, respectively.

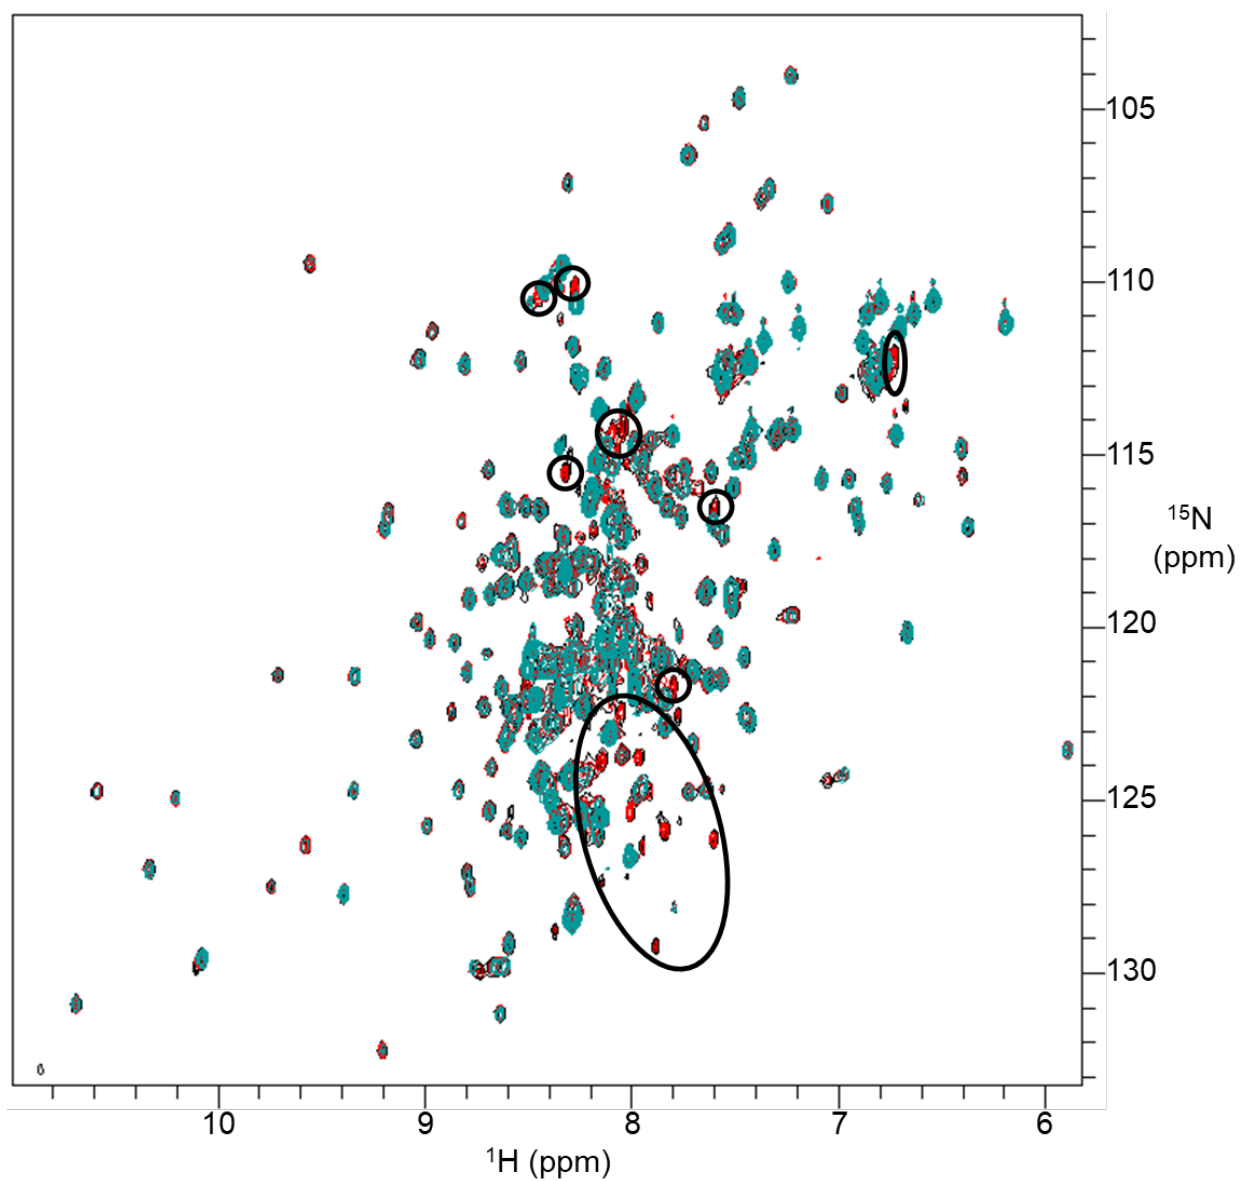

**Figure S2A.** Two-dimensional  $[\text{}^{15}\text{N}\text{-}^1\text{H}]$ -HSQC spectra of the uniformly  $^{13}\text{C}$ & $^{15}\text{N}$ -labelled full-length FBD reconstituted in 4F peptide-based DMPC nanodiscs recorded on day-1 (cyan), day-6 (red) and day-13 (black). The new peaks (indicated in the circles) appeared with time.

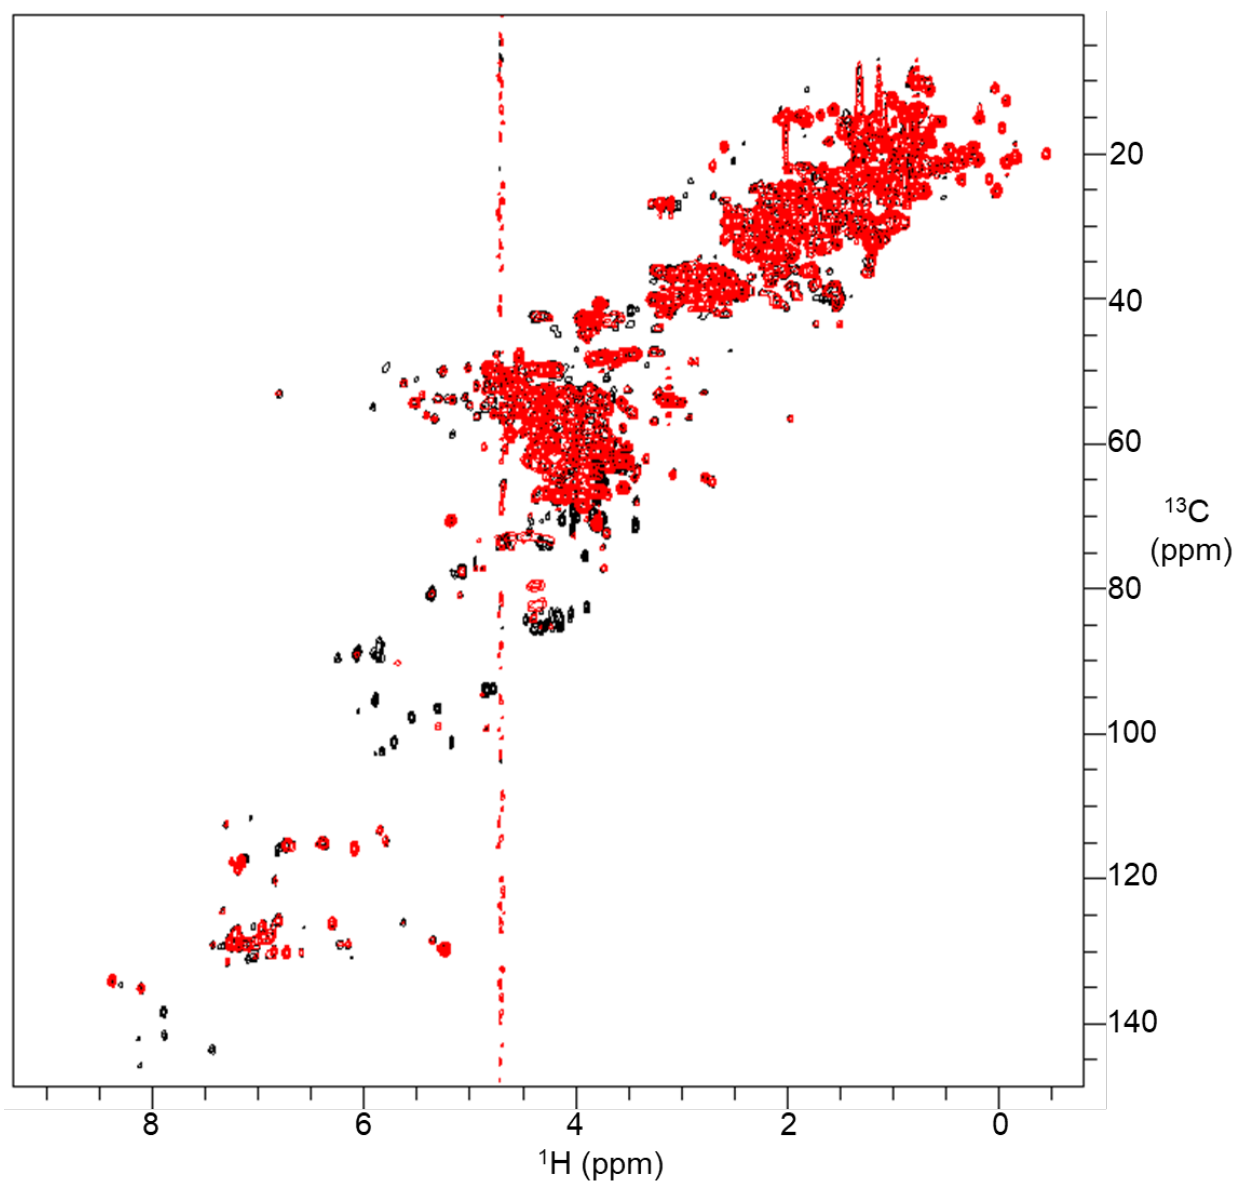

**Figure S2B.** Two-dimensional [ $^{13}\text{C}$ - $^1\text{H}$ ]-HSQC spectra of the uniformly  $^{13}\text{C}$ & $^{15}\text{N}$ -labelled full-length FBD reconstituted in 4F peptide-based DMPC nanodiscs recorded on day-1 (red) and day-6 (black). The appearance of extra peaks between 80 to 110 ppm and  $\sim 140$  ppm in  $^{13}\text{C}$ -dimension on day-6 indicates the instability of nanodiscs sample. Nevertheless, the reported resonance assignment, chemical shift values and interpretation are unaffected by the deterioration of the sample.

(A)

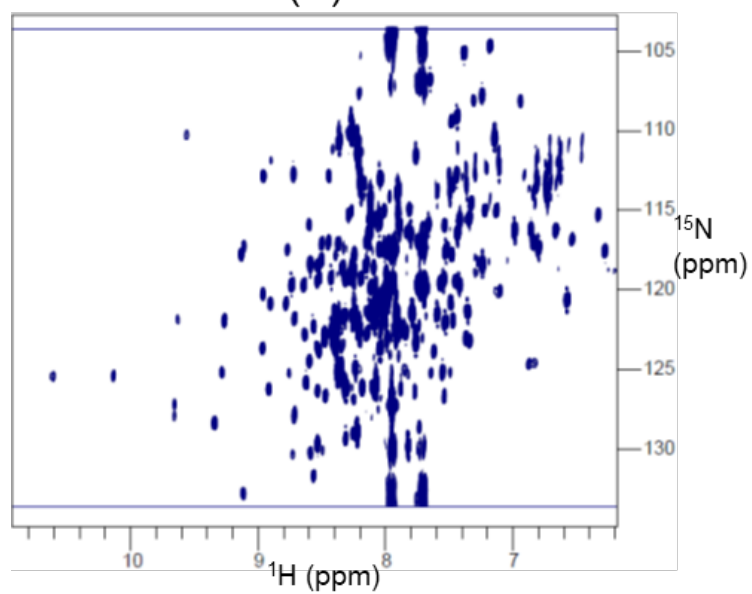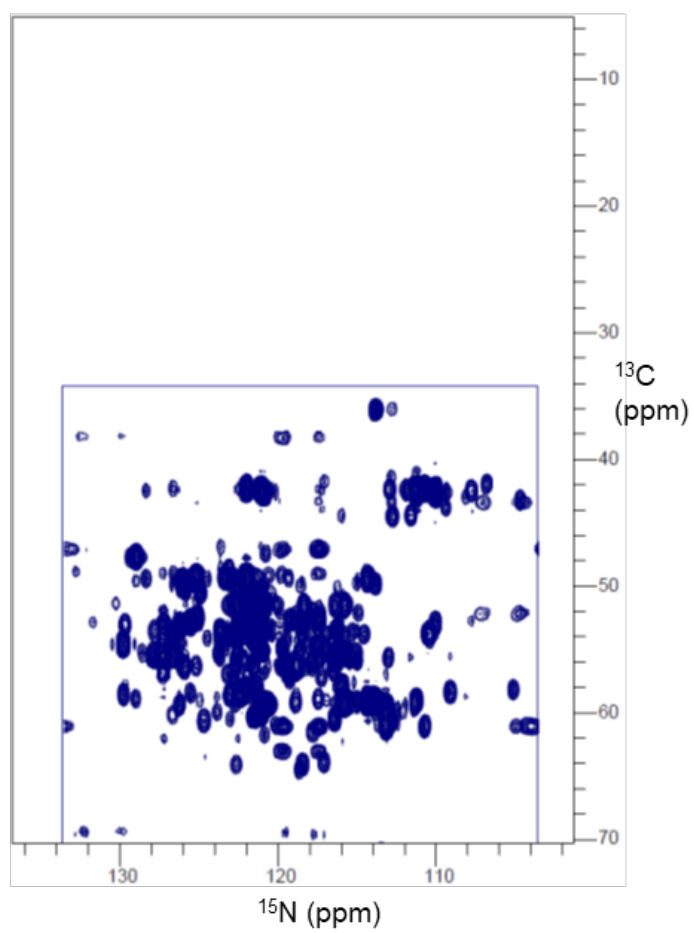

Figure S3 (continued)

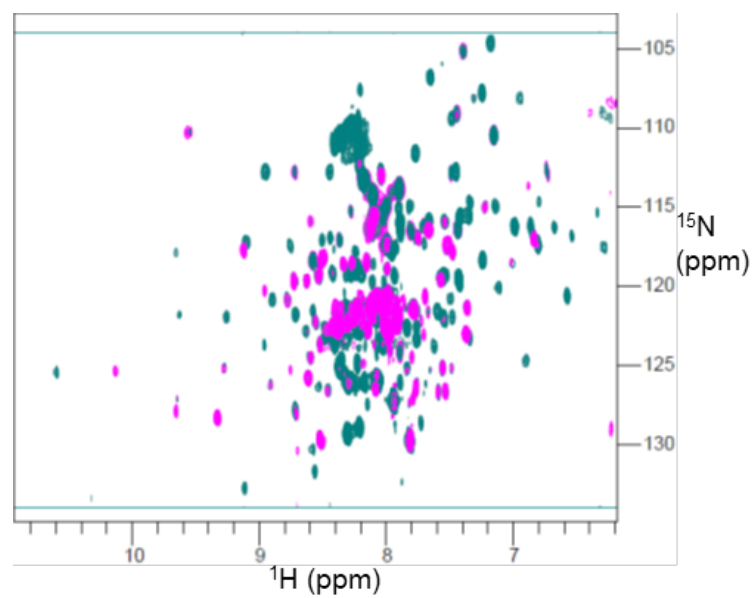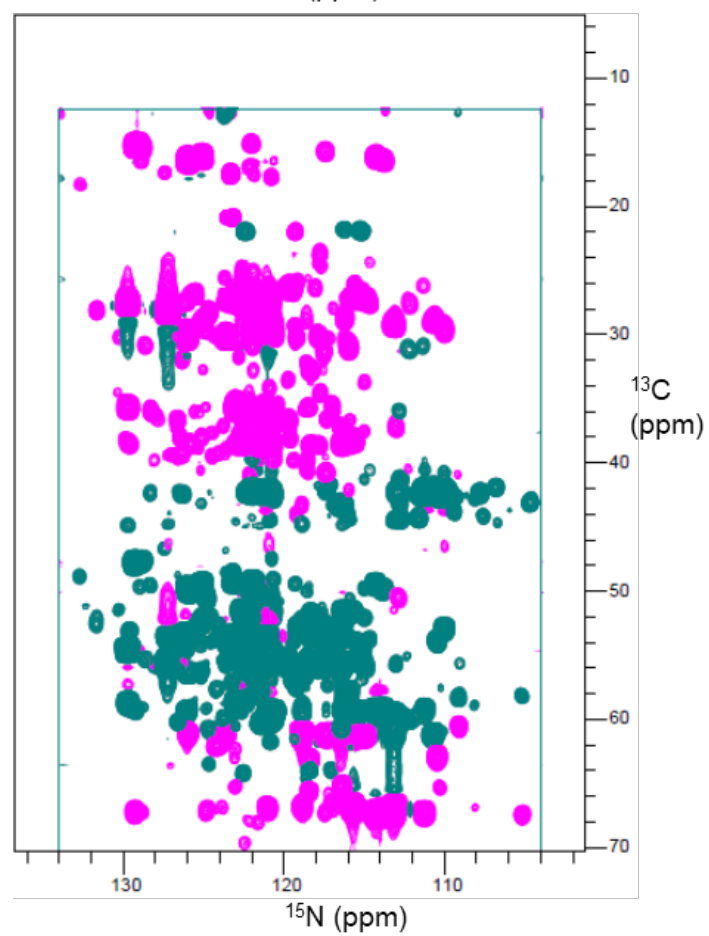

Figure S3 (continued)

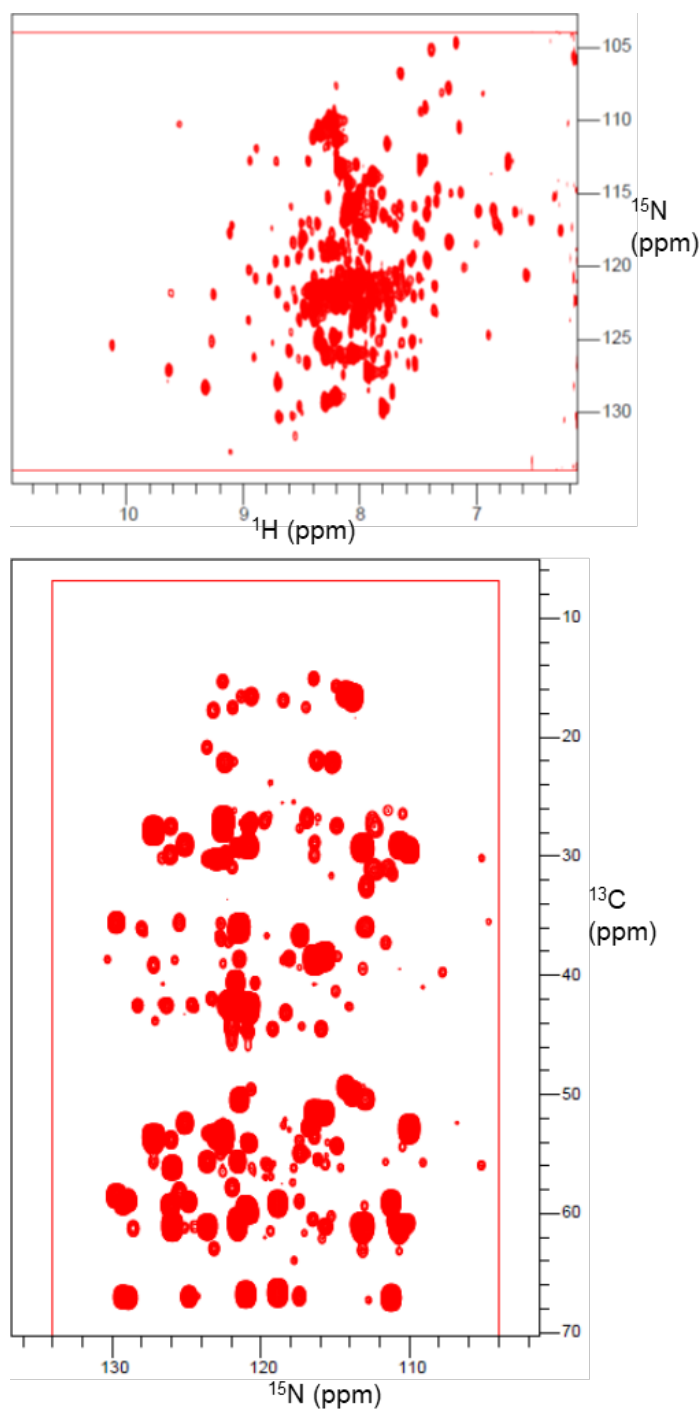

**Figure S3.** Two-dimensional  ${}^{15}\text{N}$ - ${}^1\text{H}$  (top) and  ${}^{15}\text{N}$ - ${}^{13}\text{C}$  (bottom) projections obtained from (A) 3D HNCA, (B) 3D HNCACB and (C) CBCA[CO]NH NMR spectra. NMR experiments were recorded on 600 MHz and 900 MHz Bruker NMR spectrometers equipped with a cryogenically-cooled triple-resonance ( ${}^1\text{H}$ ,  ${}^{13}\text{C}$ ,  ${}^{15}\text{N}$ ) probe. The data were processed using the Bruker TopSpin software (version 4.0.6.). The figures were made in CcpNmr Analysis (version 2.4.2).



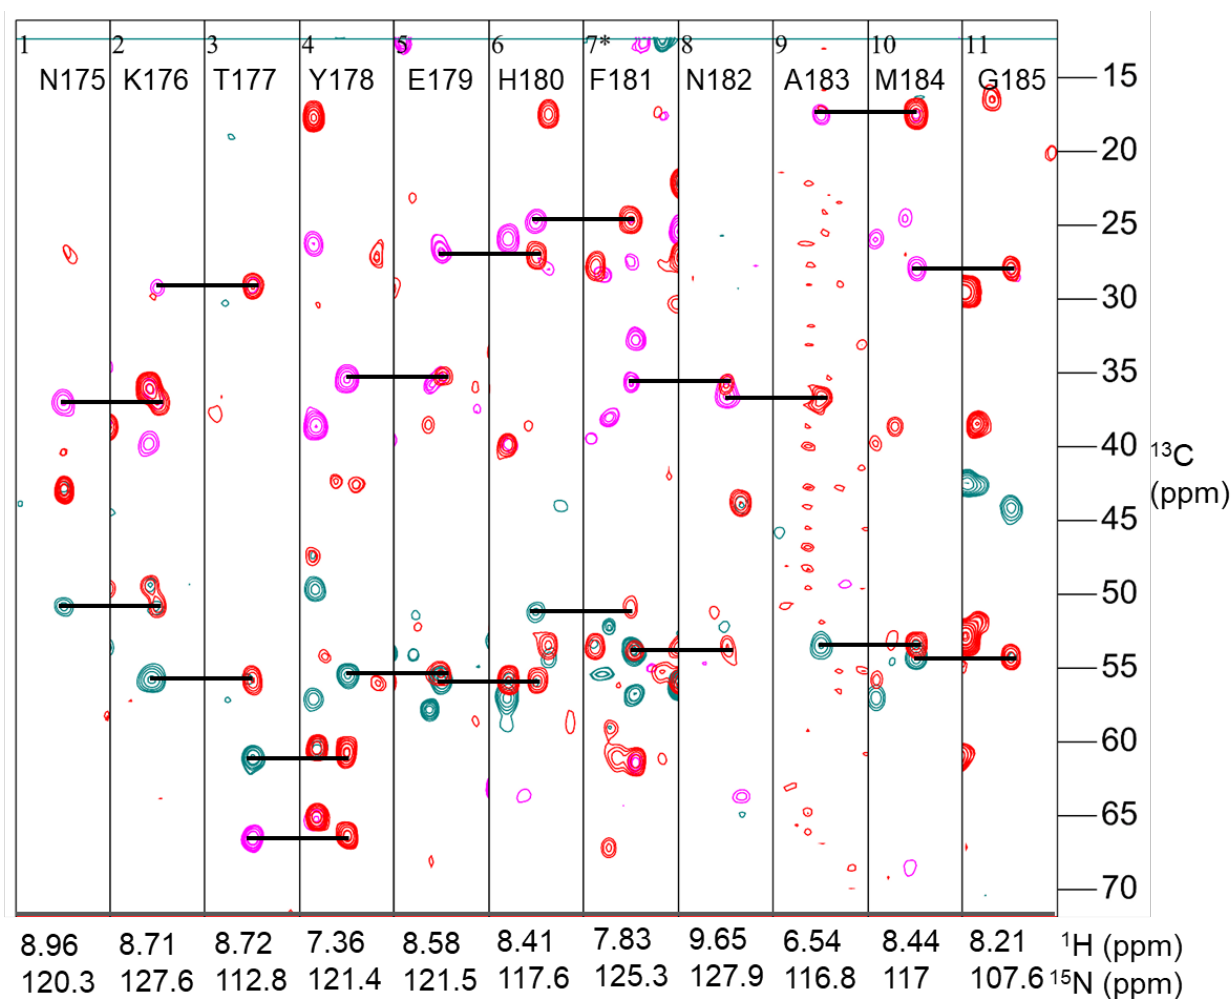

**Figure S4.** Overlay of two-dimensional  $F_1(^{13}\text{C})$ - $F_2(^{15}\text{N})$  strip plots obtained from three-dimensional HNCACB and C $\beta$ A(CO)NH spectra for the residues from Asn175 to G185. Sequential intra-residue  $\text{C}\alpha$  (cyan) and  $\text{C}\beta$  (magenta) resonances in HNCACB are connected to corresponding inter-residue resonances in C $\beta$ A(CO)NH (red) using horizontal lines.

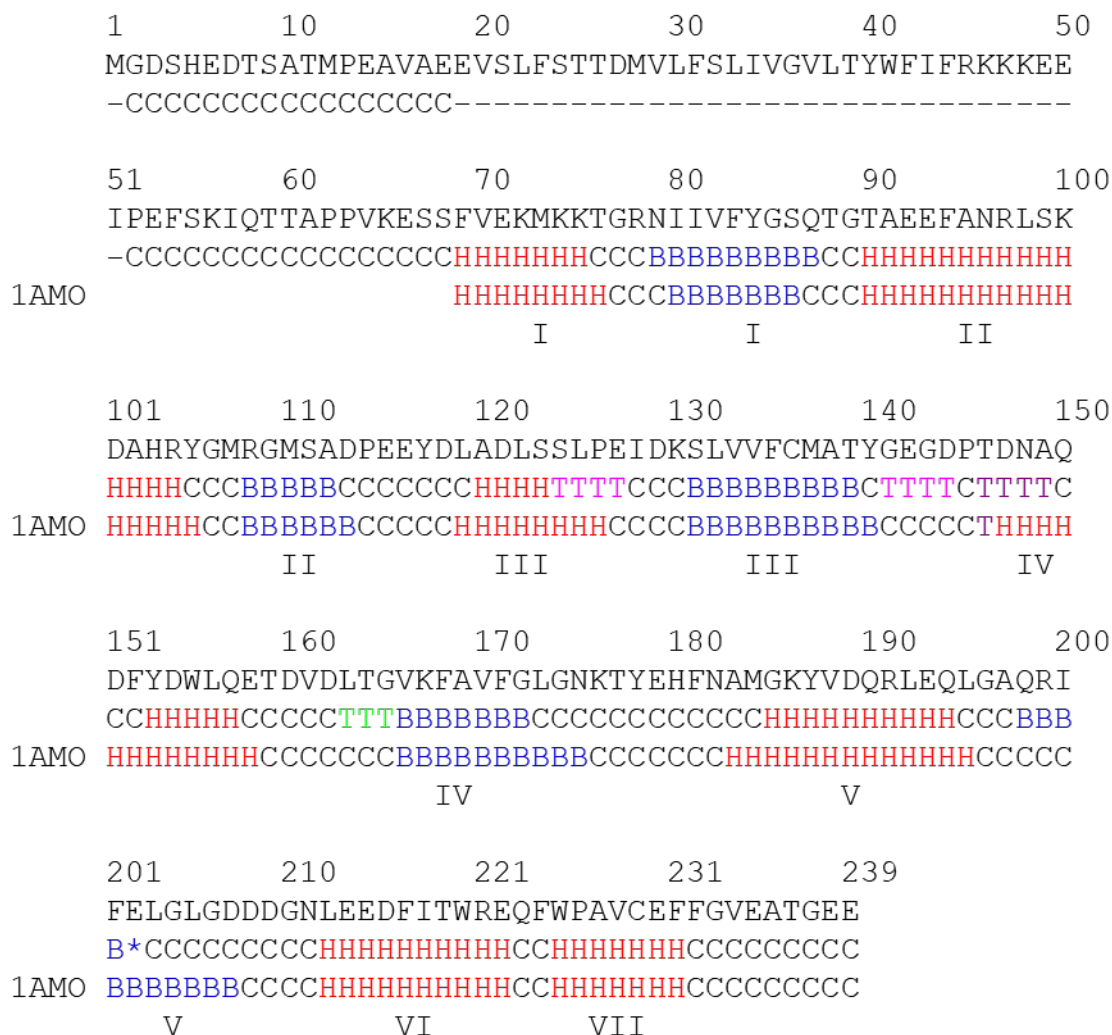

**Figure S5.** A comparison of the predicted secondary structure regions of the full-length FBD with those of 1AMO (PDB id).<sup>7</sup> The secondary structures of the full-length FBD were predicted from the experimentally measured NMR chemical shifts using the chemical shift index (CSI 3.0). ‘-’ indicates that the NMR assignments for the amino acid residues in this region are not available. The helices,  $\beta$ -sheets, turns and coils (disordered regions) are represented by H, B, T and C respectively. The roman numbers indicates the number of helices and  $\beta$ -sheets in the amino acid sequence. The distribution of the secondary structure regions in the full-length FBD and 1AMO are similar with the following major differences. In the full-length FBD, helix-III is four residues long followed by a turn whereas in 1AMO the helix-III is eight residues long without any turn. The predicted N-terminal half of helix-IV in the membrane-anchored full-length FBD is in turn/coil conformation; it is in a complete helical conformation in 1AMO. Unlike in 1AMO, the predicted C-terminal half of the  $\beta$ -sheet-V is in random-coil conformation in the full-length FBD. Other helices and  $\beta$ -sheets differ by 1-3 residues.

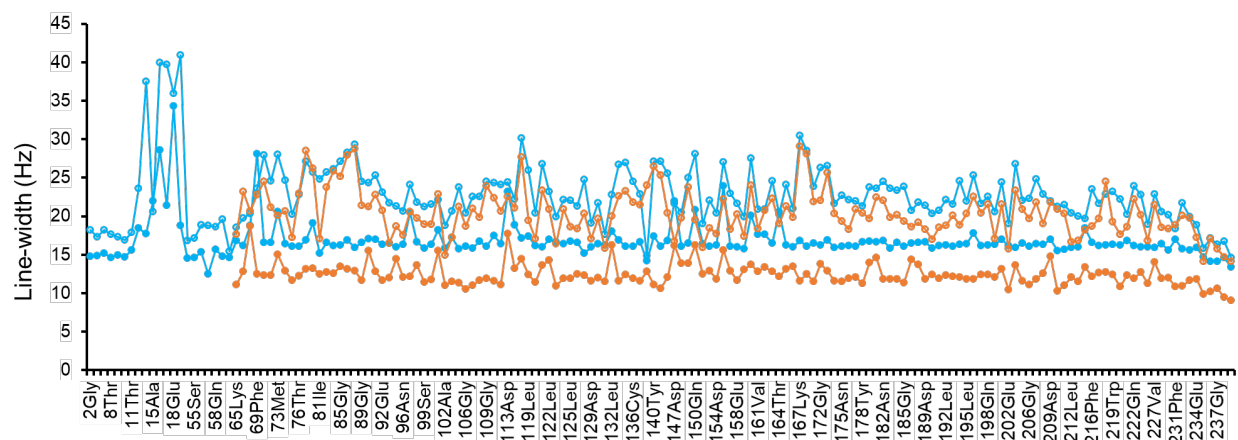

**Figure S6A.**  $^1\text{H}$  (open circles) and  $^{15}\text{N}$  (filled circles) line-widths, measured from two-dimensional  $[\text{}^{15}\text{N}\text{-}^1\text{H}]\text{-HSQC}$  NMR spectra of the the uniformly  $^{13}\text{C}$  &  $^{15}\text{N}$ -labelled full-length FBD (blue) reconstituted in 4F-DMPC nanodiscs, are compared with the values measured from a lipid-free solution sample containing the truncated-FBD lacking the transmembrane domain (orange). The line-widths observed for the residues (14-18 and 53) near the lipid-bilayered membrane are larger than the line-widths observed for those residues in the soluble domain. Similarly, the line-widths observed for the truncated FBD in solution were slightly smaller compared to that measured from the full-length FBD reconstituted in 4F-DMPC nanodiscs.

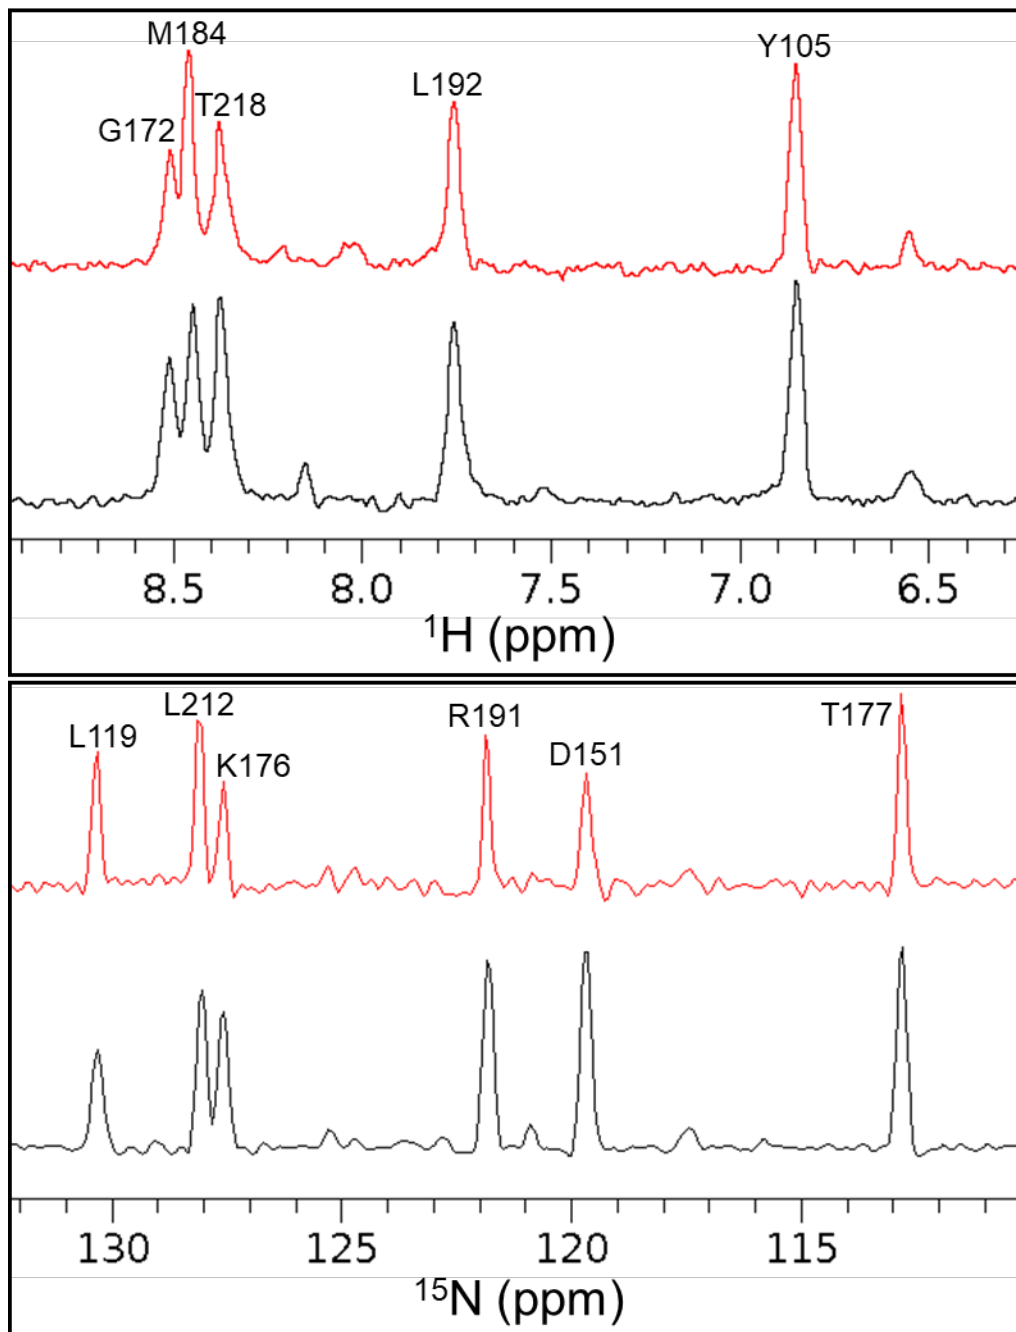

**Figure S6B.** Sample  $^1\text{H}$  and  $^{15}\text{N}$  one-dimensional slices taken from the two-dimensional  $[\text{}^{15}\text{N}\text{-}^1\text{H}]$ -HSQC NMR spectra of the the uniformly  $^{13}\text{C}$ & $^{15}\text{N}$ -labelled full-length FBD (black) reconstituted in 4F-DMPC-nanodiscs and truncated FBD (red). The measured line-widths for some of these amino acid residues are shown in **Fig. S6A** and **Table S3**.

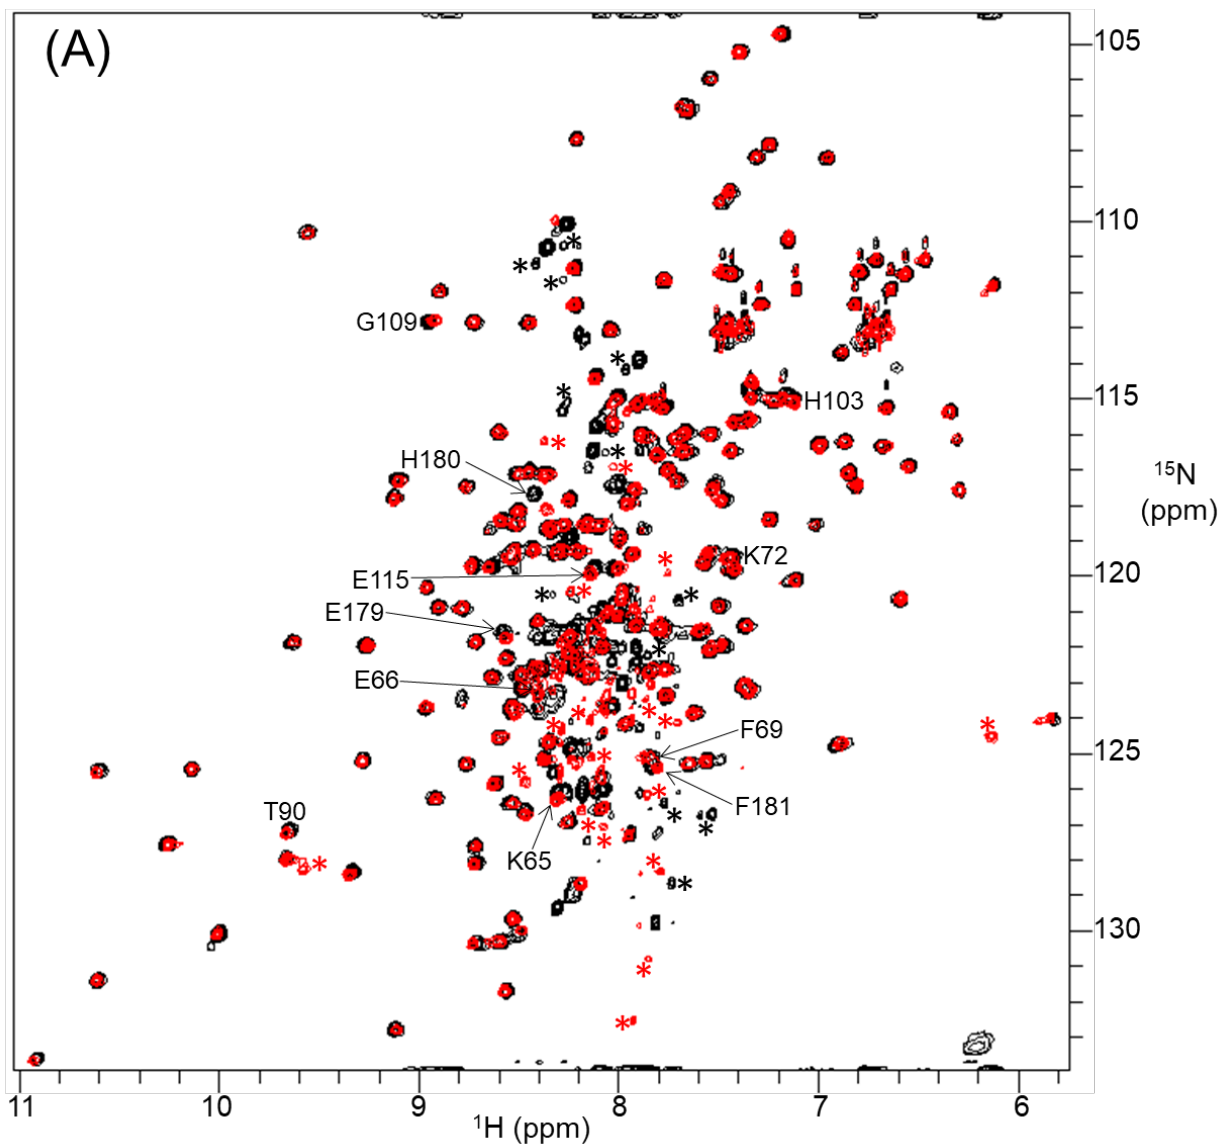

Figure S7 (continued)

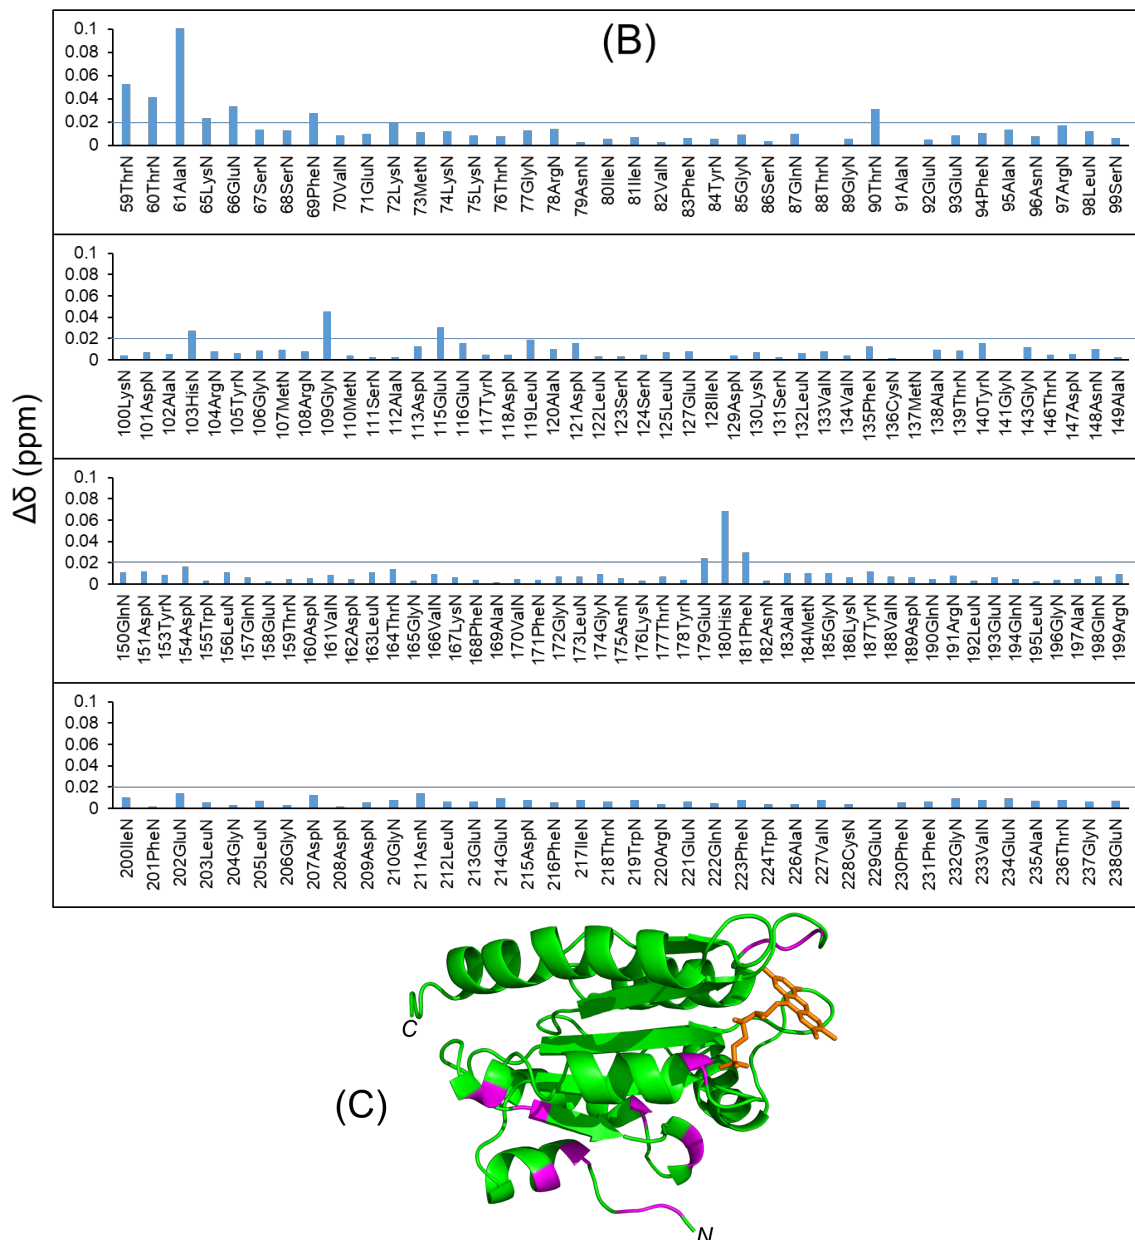

**Figure S7.** (A) Two-dimensional  $^{15}\text{N}$ - $^1\text{H}$ -HSQC spectra of the uniformly  $^{13}\text{C}$ & $^{15}\text{N}$ -labelled full-length FBD reconstituted in 4F-DMPC nanodiscs (black) and the truncated-FBD (red; lacking the transmembrane domain), respectively. The dispersion of resonances is very similar in both spectra. The missing peaks in the spectrum of the truncated-FBD are from the N-terminal region of the full-length FBD. The amide resonances with chemical shift perturbations  $\geq 0.02$  ppm are labelled with one-letter amino acid codes followed by their position in the protein sequence. The low-intensity peaks are indicated with \* symbol in each spectrum with the corresponding colors (B) Chemical shift perturbations ( $\Delta\delta$ ) in the soluble domain of FBD upon anchoring to DMPC lipid bilayer in 4F-DMPC nanodiscs. (C) Mapping of CSPs ( $\geq 0.02$ ) on to FBD structure (PDB id: 1AMO). Most of the residues that showed CSPs are in the regions close to or facing towards the lipid-bilayer membrane, suggesting that these residues may be making some transient interactions with the lipids. *N*- and *C*- indicate N- and C-termini, respectively.

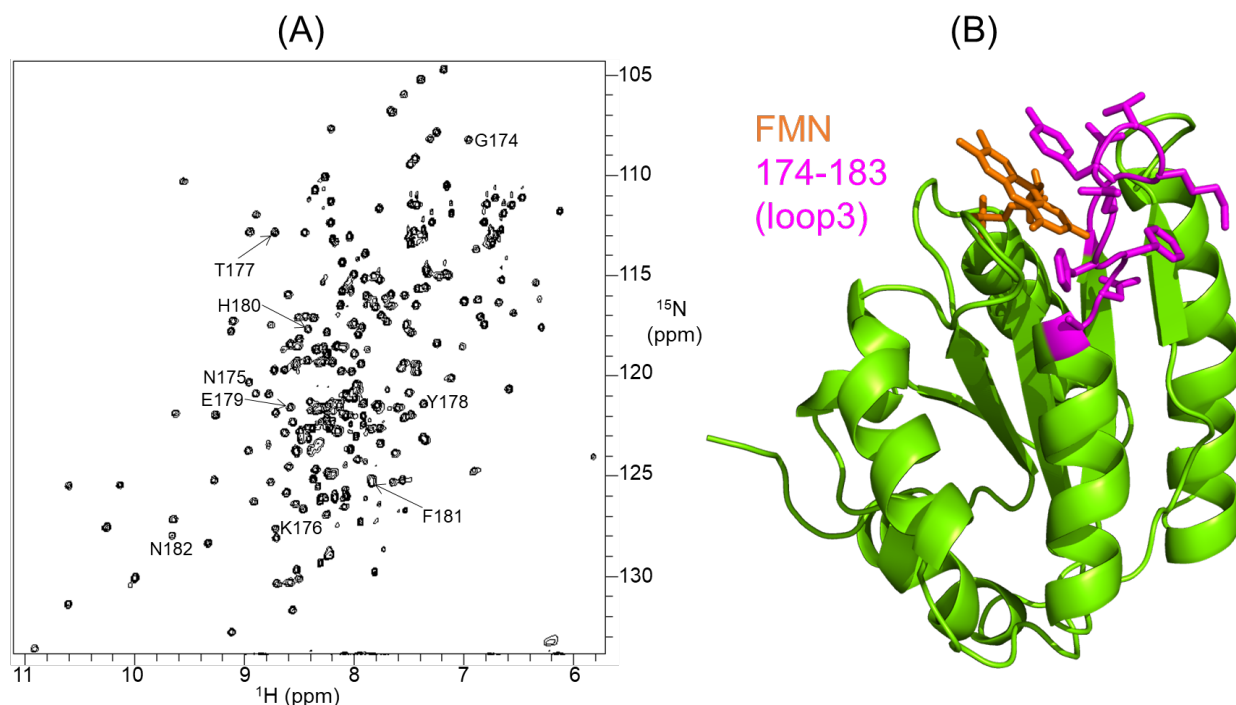

**Figure S8.** (A) Two-dimensional [ $^{15}\text{N}$ - $^1\text{H}$ ]-HSQC spectrum of 0.3 mM uniformly  $^{13}\text{C}$ & $^{15}\text{N}$ -labelled full-length FBD reconstituted in 4F-DMPC nanodiscs. The amide backbone assignments corresponding to the loop3 region are annotated by the resonance peaks with one-letter amino acid codes followed by their position in the protein sequence. NMR spectra were collected from a 4F-DMPC nanodisc sample of 0.3 mM  $^{13}\text{C}$ -,  $^{15}\text{N}$ -labelled full-length FBD in 40 mM potassium phosphate buffer (pH 7.4) containing 10%  $^2\text{H}_2\text{O}$  and 0.01% sodium azide. The spectra were recorded on a 600 MHz Bruker NMR spectrometer equipped with a cryogenically cooled triple-resonance probe operating at 25 °C. (B) The structure of FBD (PDB id: 1AMO) highlighting the 174-183 region that includes loop3 (magenta) and the FMN prosthetic group (orange).

## References

- 1 J. Sambrook and D. W. Russell, *Cold Spring Harbor Protocols*, 2006, DOI: 10.1101/pdb.prot3932, 3932.
- 2 G. Datta, M. Chaddha, S. Hama, M. Navab, A. M. Fogelman, D. W. Garber, V. K. Mishra, R. M. Epand, R. F. Epand, S. Lund-Katz, M. C. Phillips, J. P. Segrest and G. M. Anantharamaiah, *J Lipid Res*, 2001, **42**, 1096-1104.
- 3 V. K. Mishra, M. N. Palgunachari, N. R. Krishna, J. Glushka, J. P. Segrest and G. M. Anantharamaiah, *J. Biol. Chem.*, 2008, **283**, 34393-34402.
- 4 W. F. Vranken, W. Boucher, T. J. Stevens, R. H. Fogh, A. Pajon, M. Llinas, E. L. Ulrich, J. L. Markley, J. Ionides and E. D. Laue, *Proteins*, 2005, **59**, 687-696.
- 5 M. V. Berjanskii and D. S. Wishart, *BBA-Proteins Proteom.*, 2017, **1865**, 1564-1576.
- 6 M. P. Williamson, *Prog. Nucl. Magn. Reson. Spectrosc.*, 2013, **73**, 1-16.
- 7 M. Wang, D. L. Roberts, R. Paschke, T. M. Shea, B. S. S. Masters and J.-J. P. Kim, *Proc. Natl. Acad. Sci. USA*, 1997, **94**, 8411-8416.
